1 **IgA MAb blocks SARS-CoV-2 Spike-ACE2 interaction providing mucosal immunity**

2

3 Monir Ejemel<sup>#a</sup>, Qi Li<sup>#a</sup>, Shurong Hou<sup>b#</sup>, Zachary A. Schiller<sup>a#</sup>, Aaron L. Wallace<sup>a</sup>, Alla

4 Amcheslavsky<sup>a</sup>, Nese Kurt Yilmaz<sup>b</sup>, Jacqueline R. Toomey<sup>a</sup>, Ryan Schneider<sup>a</sup>, Brianna J. Close<sup>c</sup>,

5 Da-Yuan Chen<sup>c</sup>, Hasahn L. Conway<sup>c</sup>, Saeed Mohsan<sup>c</sup>, Lisa A. Cavacini<sup>a\*</sup>, Mark S. Klempner<sup>a\*</sup>,

6 Celia A. Schiffer<sup>b\*</sup>, Yang Wang<sup>a\*</sup>

7

8 <sup>a</sup>MassBiologics of the University of Massachusetts Medical School, Boston, Massachusetts,  
9 USA

10 <sup>b</sup>Biochemistry and Molecular Pharmacology, University of Massachusetts Medical School,  
11 Worcester, Massachusetts, USA

12 <sup>c</sup>National Emerging Infectious Diseases Laboratories, Boston University, Boston, Massachusetts,  
13 USA

14

15 <sup>#</sup>Co-first authors

16 <sup>\*</sup>Co-corresponding authors

17 **Summary:**

18 COVID-19 caused by SARS-CoV-2 has become a global pandemic requiring the development of  
19 interventions for the prevention or treatment to curtail mortality and morbidity. No vaccine to  
20 boost mucosal immunity or as a therapeutic has yet been developed to SARS-CoV-2. In this  
21 study we discover and characterize a cross-reactive human IgA monoclonal antibody,  
22 MAb362. MAb362 binds to both SARS-CoV and SARS-CoV-2 spike proteins and  
23 competitively blocks hACE2 receptor binding, by completely overlapping the hACE2 structural  
24 binding epitope. Furthermore, MAb362 IgA neutralizes both pseudotyped SARS-CoV and  
25 SARS-CoV-2 in human epithelial cells expressing hACE2. SARS-CoV-2 specific IgA  
26 antibodies, such as MAb362, may provide effective immunity against SARS-CoV-2 by inducing  
27 mucosal immunity within the respiratory system, a potentially critical feature of an effective  
28 vaccine.

29 **Introduction:**

30 In December 2019, a novel coronavirus (SARS-CoV-2) was identified as the cause of an  
31 outbreak of acute respiratory infections that emerged in Wuhan, China. The coronavirus disease  
32 2019 (COVID-19) ranges from *mild* to *severe acute respiratory* infection, with a fatality rate  
33 estimated *to range* from 2 to 3%<sup>1-4</sup>. Within three months of the first report cases, COVID-19  
34 rapidly disseminated through the human population and had become a global pandemic by  
35 March 2020. Phylogenic analysis has classified SARS-CoV-2 within the sarbecoviruses  
36 subgenus, the  $\beta$  lineage that also contains SARS-CoV, sharing proximately 79.6% sequence  
37 identity<sup>4</sup>.

38  
39 Interventions for the prevention or treatment of COVID-19 are crucial for the ongoing outbreak.  
40 Pre- or post-exposure immunotherapies with neutralizing antibodies, would be of great use by  
41 providing immediate mucosal immunity against SARS-CoV-2. Although concerns, as occurred  
42 with SARS-CoV<sup>5,6</sup>, that vaccines may cause disease enhancement will need to be addressed.  
43 The feasibility of human monoclonal antibodies (MAbs) as immunoprophylaxis or therapy  
44 against coronaviruses including SARS-CoV<sup>7-10</sup> and MERS-CoV<sup>11</sup> has been demonstrated. These  
45 anti-coronavirus MAbs primarily target the viral spike (S) glycoprotein, a type I transmembrane  
46 glycoprotein that produces recognizable crown-like spike structures on the virus surface. The  
47 receptor-binding domain (RBD) of the S protein facilitates viral entry into human cells through  
48 human angiotensin-converting enzyme 2 (hACE2) receptor binding leveraging a similar  
49 mechanism as SARS-CoV<sup>12-14</sup>.

50

51 Most current anti-SARS-CoV MAbs neutralize virus by binding to epitopes on the spike protein  
52 RBD of SARS-CoV<sup>15</sup>. We and others have demonstrated that neutralizing MAbs that block  
53 RBD-hACE2 binding could confer potent protection against SARS-CoV as both prophylaxis and  
54 treatment in various animal models<sup>7,9,10</sup>. Several anti-SARS-COV MAbs have demonstrated  
55 cross-neutralizing activities against the S protein of SARS-CoV-2<sup>16,17</sup>. However, to date no  
56 antibody has directly bound to the hACE2 RBD interface of SARS-CoV-2 competitively  
57 blocking the SARS-CoV-2 spike:hACE2 complex.

58  
59 Antibody-dependent enhancement of viral infections are major *hurdles* in the development of  
60 effective vaccines. This enhancement is likely facilitated by the Fc domain of IgG but not for its  
61 isotype variant IgA<sup>18</sup>. The avidity of mucosal IgA, in comparison with IgG, due to the  
62 multimeric structure, enhances the antibody binding with antigens. In addition, the diverse, high  
63 level of glycosylation of IgA antibodies, further protects the mucosal surface with non-specific  
64 interference. In animal models, high titers of mucosal IgA in the lung is correlated with reduced  
65 pathology upon viral challenge with SARS-CoV<sup>19</sup>. How precisely which isotype may protect the  
66 mucosa from SARS-CoV-2 infection remains an open question.

67  
68 In the current study we describe the discovery of a cross-neutralizing human IgA monoclonal  
69 antibody, MAb362 IgA. This IgA antibody binds to SARS-CoV-2 RBD with high affinity  
70 directly competing at the hACE2 binding interface by blocking interactions with the receptor.  
71 MAb362 IgA neutralizes both pseudotyped SARS-CoV and SARS-CoV-2 in human epithelial  
72 cells expressing ACE2. Our results demonstrate that IgA isotype, plays a critical role in SARS-  
73 CoV-2 neutralization.

74 **Results:**

75 ***Selection of MAb binding to RBD of SARS-CoV-2 in ELISA***

76 We have previously developed and characterized a panel of human MAbs that targets the RBD  
77 of the SARS-CoV S glycoprotein, isolated from transgenic mice expressing human  
78 immunoglobulin genes<sup>9,10</sup>. These 36 hybridomas were recently screened against the SARS-CoV-  
79 2 Spike protein for potential cross-bind activity. MAb362 was identified with cross-binding  
80 activity against both the S1 subunit of the SARS-CoV S<sub>1-590</sub> and SAR-CoV-2 S<sub>1-604</sub> proteins  
81 **(Extended Data Table 1).**

82  
83 While both IgG and IgA are expressed at the mucosa, IgA is more effective on a molar basis and  
84 thus the natural choice for mucosal passive immunization as we recently demonstrated in other  
85 mucosal infectious disease<sup>20,21</sup>. To further characterize the functionality of MAb362, variable  
86 sequences of MAb362 were cloned into expression vectors as either IgG or IgA1 isotypes. Both  
87 MAb362 IgG and IgA were assessed in ELISA binding assays against the receptor-binding  
88 domain (RBD) of the S1 subunit for SARS-CoV S<sub>270-510</sub> and SARS-CoV-2 S<sub>319-541</sub> (**Figure 1a**).  
89 MAb362 IgA showed better binding activities, compared to its IgG counterpart against with  
90 SARS-CoV-2 S<sub>319-541</sub> (**Figure 1b**). Assessment of the binding kinetics was consistent with the  
91 ELISA binding trends, the binding affinity of IgA with RBD of SARS-CoV-2 is significantly  
92 higher (0.3 nM) than that of IgG (13 nM) due to a much slower dissociation rate as an IgA ( $K_{\text{off}}$   
93 =  $1.13 \times 10^{-3} \pm 1.06 \times 10^{-4}$ ) compared to an IgG ( $K_{\text{off}} = 7.75 \times 10^{-5} \pm 5.46 \times 10^{-5}$ ) (**Figure 1c-f**).

94

95

96 ***Structural modeling MAb362 binding to the core domain of RBD and competes for hACE2***

97 ***binding***

98 To define the antibody-binding epitope, known co-crystal and cryo-EM complexes from SARS-  
99 CoV and MERS spike protein in complex with neutralizing antibodies were evaluated for their  
100 potential to competitively block hACE2 binding, based on the structural interface of hACE2-  
101 SARS-CoV-2-RBD (PDB ID- 6VW1)<sup>22</sup>. The 80R-SARS-CoV-RBD complex (PDB ID-  
102 2GHW)<sup>23</sup>, a crystal structure of SARS-CoV RBD in complex with a neutralizing antibody, 80R  
103 was found most closely to have these characteristics. When the sequence was evaluated, we  
104 ascertained that the two antibodies, MAb362 and 80R had frameworks with *striking 90%* amino  
105 acid *sequence identity*. Thus, the crystal structure 2GHW provided an outstanding scaffold to  
106 build a highly accurate atomic homology model of MAb362. This structure permitted the  
107 modeling with the superposition of the hACE2:SARS-CoV-2-RBD (PDB ID-6VWI) for the  
108 modeling of MAb362:SARS-CoV-2-RBD (**Figure 2a**).

109  
110 The interface between the MAb362:SARS-CoV-2-RBD complex is predicted to form extensive  
111 van der Waals contacts (**Figure 2b**). The CDRs of both the heavy and light chain make extensive  
112 interactions with SARS-CoV-2-RBD (**Figure 2c**), with the heavy chain of CDR-3 having the  
113 most extensive interaction. The binding interface of MAb362 is predicted to form 32 extensive  
114 contacts with residues on SARS-CoV-2-RBD (12 of which vary in sequence relative to SARS-  
115 CoV-RBD shown in red font) (**Figure 2d**). Seventeen of these contacts also are major points of  
116 contact between hACE2 on the SARS-CoV-2-RBD (**Figure 2e**). Thus MAb362 appears to  
117 directly compete for SARS-CoV-2 binding with hACE2.

118

119 Point mutations were engineered into the SARS-CoV-2-RBD based on this model and the  
120 overlap with the hACE2-RBD binding interface to further validate this model (**Figure 2f**). A  
121 combination of alanine and lysine mutations showed that charge mutations at the periphery  
122 (L455K) or outside the interface (N478K) had no impact, while sites that formed more extensive  
123 interactions Y449A, F456A and Y489A caused dramatic loss of binding affinity, only N501A  
124 retained affinity in a way that suggest a water mediated interaction may preserve this site. Both  
125 Y449 and Y489 are conserved with SARS-CoV while F456 is a Leucine (**Extended Data**  
126 **Figure 1-3**). Interestingly examination of the complex structure shows the close stacking of  
127 F456 against Y489 (**Figure 2g**) that together forming a combined extensive interface with light  
128 chain of MAb362, specifically the hydroxyl Y489 forms both extensive van der Waals  
129 interactions and hydrogen network at the interface. F456 forms less direct interactions, but  
130 structurally stabilizes the interactions of Y489, which explains the strong impact of the two  
131 alanine mutations F456A and Y489A. Y449A also forms extensive interactions (**Figures 2h**).  
132 Thus the loss of binding interaction from these site mutation validates our model of this complex  
133 as being biologically relevant complex  
134  
135 Complementing the mutational analysis, to correlate the epitope binding with functionality,  
136 MAb362 IgG and IgA were tested in a receptor-blocking assay with hACE2 expressing Vero E6  
137 cells. The result suggested that both MAb362 IgG and IgA block SARS-CoV-2 RBD binding to  
138 receptors in a concentration dependent manner starting at ~ 4 nM (**Figure 2i, Extended Data**  
139 **Figure 4**). Thus confirming that the MAb362 epitope is directly competing for the hACE2  
140 binding epitope on SARS-CoV-2 Spike.

141

142 ***MAb362 structural epitope***

143 The epitope of MAb362 is in fact very different from the other recently reported MAb  
144 complexes to the SARS-CoV-2-RBD, such as CR3022<sup>16</sup> or 309<sup>17</sup>. MAb362 overlaps entirely  
145 with the hACE2 epitope on the RBD (**Figure 3a**). This contrasts with CR3022 and 309 that bind  
146 to epitopes further way from the receptor-binding interface (**Figure 3b**). This finding was  
147 consistent with the unique activity of MAb362 of compromising RBD-receptor interaction. As  
148 with the binding of hACE2, the MAb362 binding epitope can only be exposed if the RBD was in  
149 the open or up conformation in the trimer (**Figure 3c**). In the closed conformation, this epitope  
150 would not be accessible to MAb362 without major steric clashes. However, unlike CR3022,  
151 MAb362 could access the hACE2 binding epitope(s) if one or more of the trimers is in this open  
152 conformation, potentially accounting for the added neutralizing activity.

153

154 ***MAb362 IgA1 neutralizes SARS-CoV and SARS-CoV-2 better than IgG***

155 To evaluate the neutralization potency of cross-reactive MAb362, we performed a pseudovirus  
156 assay using lentiviral pseudovirions on 293 cells expressing hACE2 receptor<sup>24</sup>. Both MAb362  
157 IgG and IgA showed potent neutralization activity against SARS-CoV (**Figure 4a**). MAb362  
158 IgG weakly neutralized SARS-CoV-2 pseudovirus despite its activities to block receptor binding.  
159 Interestingly, isotype switch to MAb362 IgA1 resulted in significantly enhanced neutralization  
160 potency, compared to its IgG subclass variant (**Figure 4b**). Monomeric MAb362 IgA1 was also  
161 co-expressed with J chain to produce dimeric IgA, which further improved neutralization  
162 (**Figure 4b**). This is consistent with our prior study showing isotype switch to IgA1 lead to  
163 improved antibody neutralization of HIV infection<sup>25</sup> Our data extends this observation to  
164 coronavirus, suggesting that IgA may play an important role in SARS-CoV-2 neutralization.



165 **Discussion:**

166 This study is the first report of a cross-reactive epitope within the core receptor-binding interface  
167 of the S protein of both SARS-CoV and SARS-CoV-2. MAb362 IgA neutralizes the virus via  
168 directly competing S protein binding to hACE2 receptors. Interestingly, our results show that  
169 despite the same blocking of spike interaction with hACE2, MAb362 IgG weakly neutralizes  
170 SARS-CoV-2 while its IgA1 isotype variant and its dimeric form showed significantly enhanced  
171 neutralization potency. Crystal structure studies demonstrated that IgA1 has a lengthy hinge  
172 region with a 13-a.a. insertion and a relaxed “T” like structure as compared to the more rigid “Y”  
173 like structure in IgG<sup>26,27</sup>. Thus, the increase flexibility of IgA1 would likely afford a greater  
174 reach towards its epitopes on the target and decrease steric hindrance. MAb362 IgA binds when  
175 Spike protein (trimer) is in open form. The longer IgA1 hinge may allow two Fabs to reach two  
176 RBDs of the trimer at the same time without clashes, which may not be achieved by the shorter  
177 hinge in IgG. Our results suggest that compared to IgG, SARS-CoV-2-specific IgA antibody  
178 may play an important independent role in providing protective mucosal immunity.

179  
180 Other recent structure studies have characterized antibodies targeting the RBD domain but distal  
181 from the receptor binding core interface of SARS-CoV-2, thus lack the characteristics of how  
182 MAb362 blocks the hACE2 binding epitope. Furthermore, these neutralizing IgGs, 47D11 and  
183 309, neutralize SARS-CoV-2 with high potency, but do not block receptor binding to  
184 hACE2<sup>17,28</sup>. Potentially hACE2 may not be the sole receptor for SARS-CoV-2, similar to SARS-  
185 CoV<sup>29</sup>, or these antibodies may prevent a conformational change necessary for viral entry.  
186 Further study of the interaction between MAb362, and other receptor blocking and neutralizing  
187 antibodies against SARS-CoV-2 will provide insight into the design of vaccine and

188 prophylactic/therapeutic antibodies against future emerging infections caused by this viral  
189 family.

## 190 **References:**

- 191 1 Li, Q. *et al.* Early Transmission Dynamics in Wuhan, China, of Novel Coronavirus-Infected  
192 Pneumonia. *N Engl J Med*, doi:10.1056/NEJMoa2001316 (2020).
- 193 2 Jiang, S., Du, L. & Shi, Z. An emerging coronavirus causing pneumonia outbreak in Wuhan, China:  
194 calling for developing therapeutic and prophylactic strategies. *Emerg Microbes Infect* **9**, 275-277,  
195 doi:10.1080/22221751.2020.1723441 (2020).
- 196 3 Huang, C. *et al.* Clinical features of patients infected with 2019 novel coronavirus in Wuhan,  
197 China. *The Lancet*, doi:10.1016/s0140-6736(20)30183-5 (2020).
- 198 4 Zhou, P. *et al.* A pneumonia outbreak associated with a new coronavirus of probable bat origin.  
199 *Nature*, doi:10.1038/s41586-020-2012-7 (2020).
- 200 5 Czub, M., Weingartl, H., Czub, S., He, R. & Cao, J. Evaluation of modified vaccinia virus Ankara  
201 based recombinant SARS vaccine in ferrets. *Vaccine* **23**, 2273-2279,  
202 doi:10.1016/j.vaccine.2005.01.033 (2005).
- 203 6 Liu, L. *et al.* Anti-spike IgG causes severe acute lung injury by skewing macrophage responses  
204 during acute SARS-CoV infection. *JCI Insight* **4**, doi:10.1172/jci.insight.123158 (2019).
- 205 7 Zhu, Z. *et al.* Potent cross-reactive neutralization of SARS coronavirus isolates by human  
206 monoclonal antibodies. *Proc Natl Acad Sci U S A* **104**, 12123-12128,  
207 doi:10.1073/pnas.0701000104 (2007).
- 208 8 Sui, J. *et al.* Potent neutralization of severe acute respiratory syndrome (SARS) coronavirus by a  
209 human mAb to S1 protein that blocks receptor association. *Proc Natl Acad Sci U S A* **101**, 2536-  
210 2541, doi:10.1073/pnas.0307140101 (2004).
- 211 9 Greenough, T. C. *et al.* Development and characterization of a severe acute respiratory  
212 syndrome-associated coronavirus-neutralizing human monoclonal antibody that provides  
213 effective immunoprophylaxis in mice. *J Infect Dis* **191**, 507-514, doi:10.1086/427242 (2005).
- 214 10 Roberts, A. *et al.* Therapy with a severe acute respiratory syndrome-associated coronavirus-  
215 neutralizing human monoclonal antibody reduces disease severity and viral burden in golden  
216 Syrian hamsters. *J Infect Dis* **193**, 685-692, doi:10.1086/500143 (2006).
- 217 11 Du, L. *et al.* MERS-CoV spike protein: a key target for antivirals. *Expert Opin Ther Targets* **21**,  
218 131-143, doi:10.1080/14728222.2017.1271415 (2017).
- 219 12 Letko, M. & Munster, V. Functional assessment of cell entry and receptor usage for lineage B  
220 betacoronaviruses, including 2019-nCoV. doi:10.1101/2020.01.22.915660 (2020).
- 221 13 Li, W. *et al.* Angiotensin-converting enzyme 2 is a functional receptor for the SARS coronavirus.  
222 *Nature* **426**, 450-454, doi:10.1038/nature02145 (2003).
- 223 14 Becker, M. M. *et al.* Synthetic recombinant bat SARS-like coronavirus is infectious in cultured  
224 cells and in mice. *Proc Natl Acad Sci U S A* **105**, 19944-19949, doi:10.1073/pnas.0808116105  
225 (2008).
- 226 15 Jiang, S., Hillyer, C. & Du, L. Neutralizing Antibodies against SARS-CoV-2 and Other Human  
227 Coronaviruses. *Trends Immunol*, doi:10.1016/j.it.2020.03.007 (2020).
- 228 16 Yuan, M. *et al.* A highly conserved cryptic epitope in the receptor-binding domains of SARS-CoV-  
229 2 and SARS-CoV. *Science*, doi:10.1126/science.abb7269 (2020).

- 230 17 Pinto, D. *et al.* Structural and functional analysis of a potent sarbecovirus neutralizing antibody.  
231 *bioRxiv*, doi:10.1101/2020.04.07.023903 (2020).
- 232 18 Bakema, J. E. & van Egmond, M. Immunoglobulin A: A next generation of therapeutic  
233 antibodies? *MABs* **3**, 352-361, doi:10.4161/mabs.3.4.16092 (2011).
- 234 19 Du, L. *et al.* The spike protein of SARS-CoV--a target for vaccine and therapeutic development.  
235 *Nat Rev Microbiol* **7**, 226-236, doi:10.1038/nrmicro2090 (2009).
- 236 20 Stoppato, M. *et al.* Oral administration of an anti-CfaE secretory IgA antibody protects against  
237 Enterotoxigenic Escherichia coli diarrheal disease in a nonhuman primate model. *Vaccine* **38**,  
238 2333-2339, doi:10.1016/j.vaccine.2020.01.064 (2020).
- 239 21 Hu, Y. *et al.* Preformulation Characterization and Stability Assessments of Secretory IgA  
240 Monoclonal Antibodies as Potential Candidates for Passive Immunization by Oral  
241 Administration. *J Pharm Sci* **109**, 407-421, doi:10.1016/j.xphs.2019.07.018 (2020).
- 242 22 Shang, J. *et al.* Structural basis of receptor recognition by SARS-CoV-2. *Nature*,  
243 doi:10.1038/s41586-020-2179-y (2020).
- 244 23 Hwang, W. C. *et al.* Structural basis of neutralization by a human anti-severe acute respiratory  
245 syndrome spike protein antibody, 80R. *J Biol Chem* **281**, 34610-34616,  
246 doi:10.1074/jbc.M603275200 (2006).
- 247 24 Ou, X. *et al.* Characterization of spike glycoprotein of SARS-CoV-2 on virus entry and its immune  
248 cross-reactivity with SARS-CoV. *Nat Commun* **11**, 1620, doi:10.1038/s41467-020-15562-9 (2020).
- 249 25 Yu, X. *et al.* Impact of IgA constant domain on HIV-1 neutralizing function of monoclonal  
250 antibody F425A1g8. *J Immunol* **190**, 205-210, doi:10.4049/jimmunol.1201469 (2013).
- 251 26 Boehm, M. K., Woof, J. M., Kerr, M. A. & Perkins, S. J. The Fab and Fc fragments of IgA1 exhibit a  
252 different arrangement from that in IgG: a study by X-ray and neutron solution scattering and  
253 homology modelling. *J Mol Biol* **286**, 1421-1447, doi:10.1006/jmbi.1998.2556 (1999).
- 254 27 Woof, J. M. & Burton, D. R. Human antibody-Fc receptor interactions illuminated by crystal  
255 structures. *Nat Rev Immunol* **4**, 89-99, doi:10.1038/nri1266 (2004).
- 256 28 Wang, C. *et al.* A human monoclonal antibody blocking SARS-CoV-2 infection. *bioRxiv*,  
257 doi:10.1101/2020.03.11.987958 (2020).
- 258 29 Jeffers, S. A. *et al.* CD209L (L-SIGN) is a receptor for severe acute respiratory syndrome  
259 coronavirus. *Proc Natl Acad Sci U S A* **101**, 15748-15753, doi:10.1073/pnas.0403812101 (2004).
- 260 30 Walls, A. C. *et al.* Structure, Function, and Antigenicity of the SARS-CoV-2 Spike Glycoprotein.  
261 *Cell*, doi:10.1016/j.cell.2020.02.058 (2020).
- 262 31 Wrapp, D. *et al.* Cryo-EM structure of the 2019-nCoV spike in the prefusion conformation.  
263 *Science* **367**, 1260-1263, doi:10.1126/science.abb2507 (2020).
- 264 32 Giuntini, S. *et al.* Identification and Characterization of Human Monoclonal Antibodies for  
265 Immunoprophylaxis against Enterotoxigenic Escherichia coli Infection. *Infect Immun* **86**,  
266 doi:10.1128/IAI.00355-18 (2018).
- 267 33 Wang, Y. *et al.* G glycoprotein amino acid residues required for human monoclonal antibody  
268 RAB1 neutralization are conserved in rabies virus street isolates. *Antiviral Res* **91**, 187-194,  
269 doi:10.1016/j.antiviral.2011.06.002 (2011).
- 270 34 Li, F., Li, W., Farzan, M. & Harrison, S. C. Structure of SARS coronavirus spike receptor-binding  
271 domain complexed with receptor. *Science* **309**, 1864-1868, doi:10.1126/science.1116480 (2005).
- 272 35 Harder, E. *et al.* OPLS3: A Force Field Providing Broad Coverage of Drug-like Small Molecules and  
273 Proteins. *J Chem Theory Comput* **12**, 281-296, doi:10.1021/acs.jctc.5b00864 (2016).
- 274 36 Leidner, F., Kurt Yilmaz, N., Paulsen, J., Muller, Y. A. & Schiffer, C. A. Hydration Structure and  
275 Dynamics of Inhibitor-Bound HIV-1 Protease. *J Chem Theory Comput* **14**, 2784-2796,  
276 doi:10.1021/acs.jctc.8b00097 (2018).

277 **Acknowledgements:**

278 We thank Dr. Julia Tree at Medical Interventions Group, National Infection Service at  
279 Public Health England for support and advice on antibody screen. We thank Dr. Robert Finberg  
280 at UMMS for helpful advice on functional assays. The initial mouse immunization work in 2005  
281 was supported by NIH Contract NO1-AI-65315. S.H., N.Y.K. and C.A.S. were supported by  
282 NIH R01AI150478

283 **Author Contributions:**

284 M.E., Q.L. cloned, expressed and purified MAbs, S proteins, truncations, and variants with  
285 assistance from A.W., A.A., J.T., and R.S. M.E. and Q.L. designed and performed affinity and  
286 binding assays and flow cytometry with assistance from Y.W., L.A.C., and Z.A.S.  
287 S.H., carried out structural modeling and analyses with assistance from Q.L. N.Y.K. Y.W. and  
288 C.A.S. M.E. and Q.L. conducted pseudovirus neutralization with assistance from B.J.C., D-Y.C.,  
289 H.L.C., S.M., L.A.C., and Y.W. Z.A.S. conducted data and statistical analysis with assistance  
290 from M.E., Q.L., and Y.W. Z.A.S. and Y.W. wrote the paper with assistance from M.E., Q.L.,  
291 L.A.C., M.S.K., and C.A.S. M.S.K., L.A.C., and Y.W. supervised the project.

292 **Competing interests**

293 A patent application has been filed on 5 May 2020 on monoclonal antibodies targeting SARS-  
294 CoV-2 (U.S. Patent and Trademark Office patent application no. 63/020,483; patent applicants:  
295 Y.W., M.E., Q.L., and M.K., University of Massachusetts Medical School).

296

297

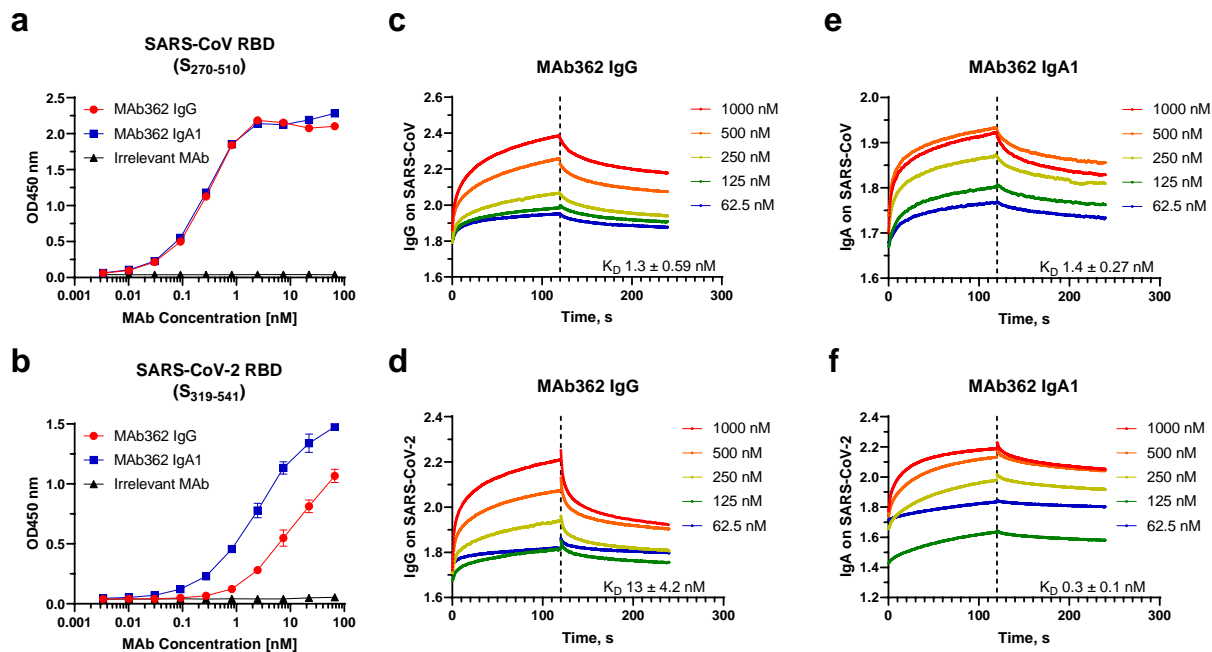

298

299 **Figure 1. Binding of MAb362 IgG and IgA1 to the RBD of SARS-CoV and SARS-CoV-2**

300 MAb362 IgG and IgA1 bind to purified RBD truncations of the S glycoprotein of SARS-CoV

301 (S<sub>270-510</sub>) (a) and SARS-CoV-2 (S<sub>319-541</sub>) (b). Affinity measurements of MAb362 IgG (c, d) and

302 IgA1 (e, f) against the RBD truncations of S glycoprotein of SARS-CoV (S<sub>270-510</sub>) and SARS-

303 CoV-2 (S<sub>319-541</sub>) were conducted using bio-layer interferometry and demonstrate nano and sub-

304 nanomolar affinities. Data is plotted as the average  $\pm$  SD from two independent experiments.

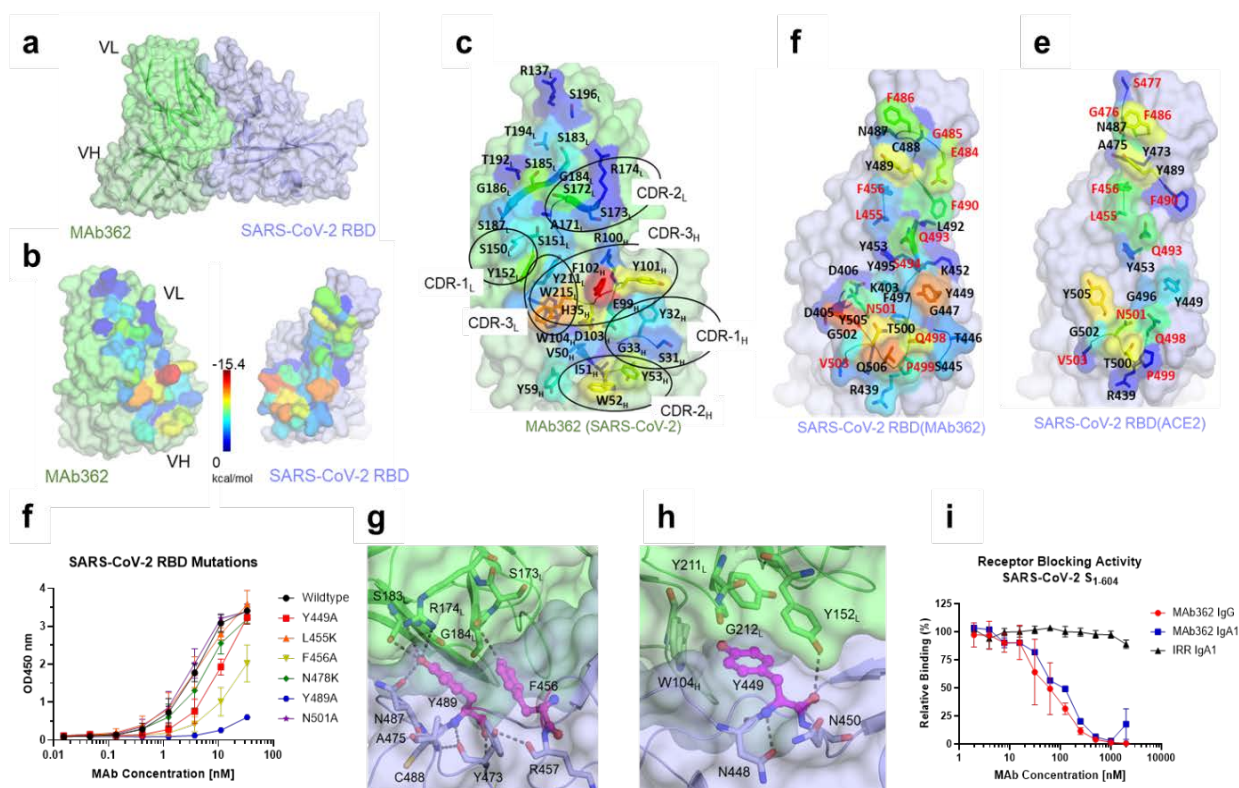

305

306

307 **Figure 2. Structural modeling MAb362 binding to the core domain of RBD and competes**  
 308 **for hACE2 binding**

309 MAb362 is predicted to have an extensive complementary interface with SARS-CoV-2 RBD that  
 310 extensively overlaps with the hACE2 binding interface. (a) Surface representation of the  
 311 complex, MAb362 in green, with SARS-CoV-2 RBD in violet. (b) The complex is separated  
 312 and rotated by  $\sim 45^\circ$  to highlight the extensive van der Waals buried surface areas on each  
 313 protein, the spectrum of color coding represents the extent of the predicted van der Waals contact,  
 314 with red being the most extensive contact and dark blue the least. (c) Detailed van der Waals of  
 315 MAb362, residues from all the CDR's from both heavy and light chains pack against the SARS-  
 316 CoV-2 RBD. (d) The binding interface on SARS-CoV-2 RBD with MAb362. (e) The binding



317 interface on SARS-CoV-2 RBD with hACE2. Residues names shown in red are those that differ  
318 in sequence between SARS-CoV and SARS-CoV-2.

319

320 **(f)** Binding affinity of wildtype and six SARS-CoV-2 RBD variants validated critical residues  
321 identified by SARS-CoV-2 RBD modeling. Data is plotted as the average  $\pm$  SD from three  
322 independent experiments. **(g)** MAb362 IgG and IgA1 dose dependent reduction of S<sub>1</sub> truncation  
323 of SARS-CoV-2 (S<sub>1-604</sub>) binding to hACE2 receptors on transfected Vero E6 cells. Data is  
324 plotted as the average  $\pm$  SD from two independent experiments. **(h)** Interactions of SARS-CoV-2  
325 RBD (violet) Y489 and F456 (in pink) with MAb362 (green) dotted lines indicate potential  
326 hydrogen bonds. **(i)** Interactions of SARS-CoV-2 RBD (violet) Y449 (pink) with MAb362  
327 (green).

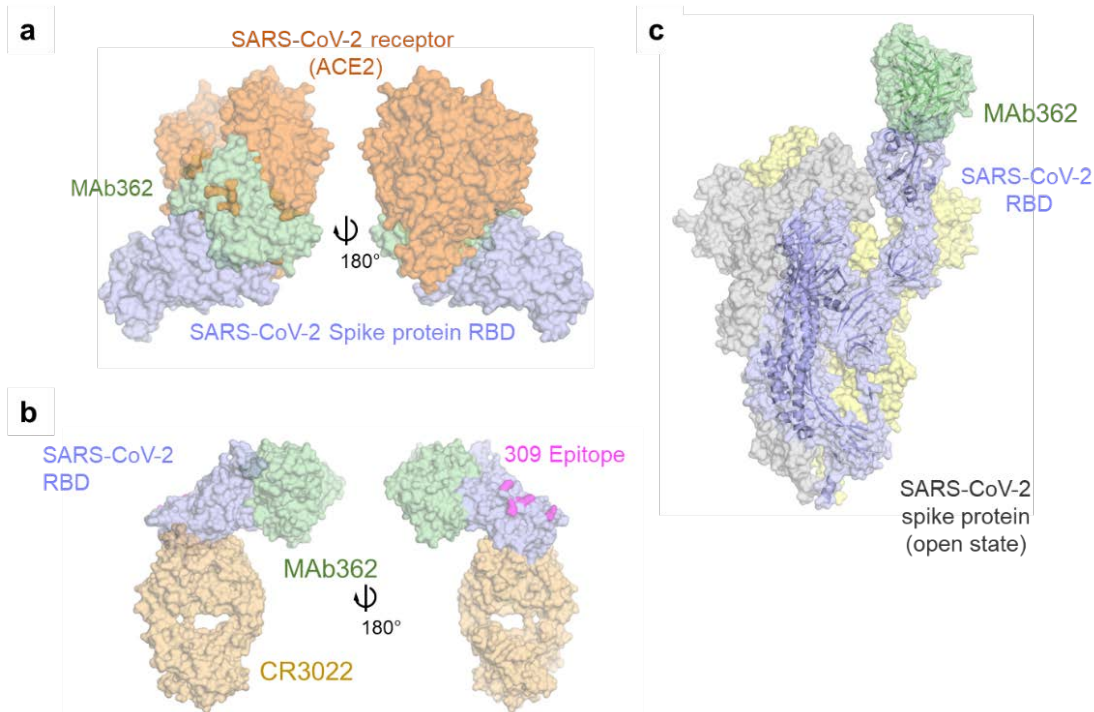

328

329

### 330 **Figure 3. MAb362 structural epitope**

331 (a) Superposition of the space filling structures of MAb362 (green) on the complex of hACE2  
332 (orange) -SARS-CoV-2 RBD (violet) (**6VW1**) two views are rotated 180°. (b) Positioning of  
333 MAb362 on SARS-CoV-2 RBD (violet) relative to the binding of MAbs CR3022<sup>16</sup> (cream) or  
334 309<sup>17</sup> epitope (pink). (c) MAb362 modeled on the Spike trimer in open conformation with one  
335 RBD domain exposed **6VYB**<sup>30</sup>. Note that the binding has no steric clashes with the other  
336 monomers.



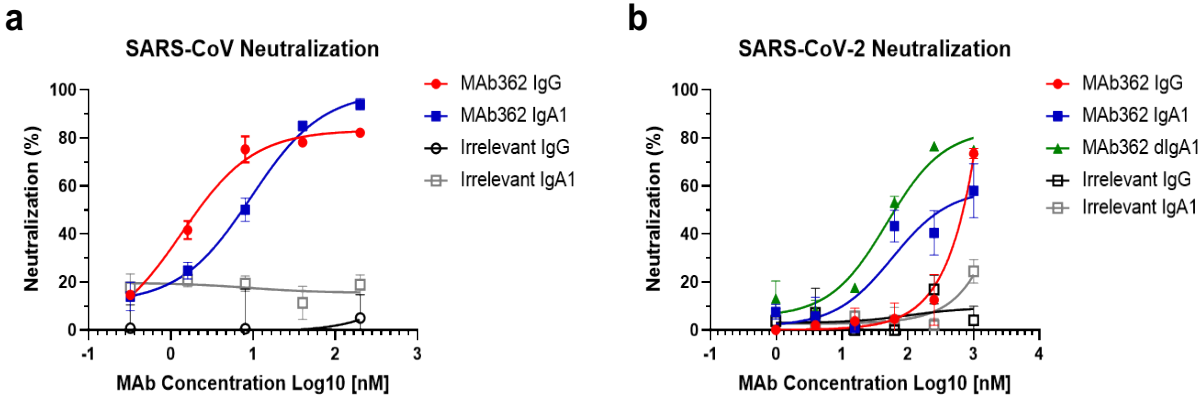

337

338

339 **Figure 4. IgA isotype switch enhances MAb362 neutralization of SARS-CoV-2**

340 MAb362 antibody-mediated neutralization of luciferase-encoding pseudovirions with spike  
341 proteins of SARS-CoV (a) and SARS-CoV-2 (b). SARS-CoV and SARS-CoV-2 pseudovirions  
342 pre-incubated with fivefold dilutions of MAb362 (0.32 to 200 nM) were used to infect 293 cells  
343 expressing hACE2 receptor. Pseudoviral transduction was measured by luciferase activities in  
344 cell lysates 48 hrs post transduction to calculate neutralization (%) relative to non-antibody-  
345 treated controls. Data is plotted as the average  $\pm$  SD from two independent experiments.

346 **Materials and Methods:**

347 *S glycoprotein expression and purification*

348 SARS-CoV and SARS-CoV-2 S glycoproteins were expressed and purified as previously  
349 described<sup>9</sup>. Briefly, the amino acid sequence of the SARS-CoV S glycoprotein (Urbani strain,  
350 National Center for Biotechnology Information [strain no. AAP13441]) and SARS-CoV-2 S  
351 glycoprotein sequence (GeneBank: MN908947) were used to design a codon-optimized version  
352 of the gene encoding the ectodomain of the S glycoproteins a.a. 1–1255 [S<sub>1-1190</sub>] for SARS-CoV  
353 and a.a. 1-1273 [S<sub>1-1255</sub>] for SARS-CoV-2, as described elsewhere<sup>31</sup>. The synthetic gene was  
354 cloned into pcDNA3.1 Myc/His in-frame with c-Myc and 6-histidine epitope tags that enabled  
355 detection and purification. Truncated soluble S glycoproteins were generated by polymerase  
356 chain reaction (PCR) amplification of the desired fragments from the vectors encoding S<sub>1255</sub> and  
357 S<sub>1273</sub>. The SARS-CoV-2 RBD constructs carrying point mutation were generated by following  
358 the standard protocol from QuikChange® II XL Kit (Agilent). The cloned genes were sequenced  
359 to confirm that no errors had accumulated during the PCR process. All constructs were  
360 transfected into Expi293 cells using ExpiFectamine™ 293 Transfection Kit (Thermo Fisher).  
361 Antibodies were purified by immobilized metal chelate affinity chromatography using nickel-  
362 nitrilotriacetic acid (Ni-NTA) agarose beads. Antibodies were eluted from the columns using 250  
363 mmol/L imidazole and then dialyzed into phosphate buffered saline (PBS), pH 7.2.

364

365 *Generation of MAbs*

366 Previously generated frozen hybridomas of anti-SARS-CoV MAbs<sup>9</sup> were recovered and scaled  
367 up. Hybridoma supernatants were screened for reactivity to the SARS-CoV-2 S protein. Positive  
368 cell clones were selected for antibody sequencing. The heavy chain and light chain variable

369 regions were amplified from hybridoma cells and cloned into an immunoglobulin G1 (IgG)  
370 expression vector. Isotype switching was conducted using primers designed to amplify the  
371 variable heavy chain of the IgG antibody. Products were digested and ligated into a pcDNA 3.1  
372 vector containing the heavy constant IgA1 chain. The vector was transformed in NEB5- $\alpha$   
373 competent cells, and sequences were verified ahead of transient transfection. IgG and IgA1  
374 antibodies were transfected in Expi293 cells and purified as previously described<sup>32</sup>. For dimeric  
375 IgA (dIgA), the heavy and light chain vectors were cotransfected with pcDNA-containing DNA  
376 for the connecting J chain. Purified antibodies were dialyzed against PBS and then concentrated  
377 and quality tested by SDS-PAGE.

378

#### 379 *ELISA*

380 Dilutions of purified MAbs were tested in ELISA for reactivity against recombinant S protein.  
381 Briefly, 96-well plates were coated with S proteins followed by incubation overnight at 4°C. The  
382 plates were blocked with 1% BSA with 0.05% Tween 20 in PBS. Hybridoma supernatant or  
383 purified antibody diluted in 1× PBS plus 0.1% Tween 20 and added to the 96-well plates and  
384 incubated for 1 hour at room temperature. The plates were stained with horseradish peroxidase-  
385 conjugated anti-kappa (1:2,000) for 1 h and developed using 3,3',5,5'-tetramethylbenzidine.  
386 Absorbance at an optical density at 450 nm (OD450) was measured on an Emax precision plate  
387 reader (Molecular Devices) using Softmax software.

388

#### 389 *Flow cytometry-based receptor binding inhibition assay*

390 Vero E6 cells were harvested with PBS containing 5 mM EDTA and aliquoted to  $1 \times 10^6$  cells per  
391 reaction. Cells were pelleted then resuspended in PBS containing 10% FBS. Before mixing with

392 the cells, Myc-tagged SARS-CoV S<sub>1-590</sub> or SARS-CoV-2 S<sub>1-604</sub> was incubated with the MAb at  
393 varying concentrations for 1 hour at room temperature, then the S protein was added to the Vero  
394 cells to a final concentration of 10 nM. The cells-S protein mixture was incubated for 1 h at room  
395 temperature. After incubation, the cell pellets were washed and then resuspended in PBS with 2%  
396 FBS and incubated with 10 µg/mL of anti-Myc antibody for 1 hour at 4°C. Pellets were washed  
397 again then subsequently incubated with a Phycoerythrin-conjugated anti-mouse IgG (Jackson  
398 Immuno Research) for 40 minutes at 4°C. Cells were washed twice then subjected to flow  
399 cytometric analysis using a MACSquant Flow Cytometer (Miltenyi Biotec) and analyzed by  
400 FlowJo (version 10). Binding was expressed as relative to cells incubated with S proteins only.

401

#### 402 *Pseudotyped virus neutralization assay*

403 Production of pseudotyped SARS-CoV and SARS-CoV-2 was performed as previously  
404 described<sup>33</sup>. Pseudovirus was generated employing an HIV backbone that contained a mutation  
405 to prevent HIV envelope glycoprotein expression and a luciferase gene to direct luciferase  
406 expression in target cells (pNL4-3.Luc.R-E-, obtained from Dr. Nathaniel Landau, NIH).  
407 SARS-S and SARS2-S spike protein was provided in *trans* by co-transfection of 293T cells with  
408 pcDNA-G with pNL4-3.Luc.R-E-. Supernatant containing virus particles was harvested 48–72 h  
409 post-transfection, concentrated using Centricon 70 concentrators, aliquoted and stored frozen at -  
410 80 degree. Before assessing antibody neutralization, the 293T cells were transiently transfected  
411 with 100ng pcDNA-hACE2 each well in 96 well plates, and the cells were used for the  
412 pseudovirus infection 24 hours after transfection. A titration of pseudovirus was performed on  
413 293T cells transiently transfected with hACE2 receptor to determine the volume of virus need to  
414 generate 50,000 counts per second (cps) in the infection assay. The appropriate volume of

415 pseudovirus was pre-incubated with varying concentrations of MAbs for 1 h at room temperature  
416 before adding to 293T cells expressing hACE2. 24 hours after the infection, the pseudovirus was  
417 replaced by the fresh complete media, and 24 hours after media changing the infection was  
418 quantified by luciferase detection with BrightGlo luciferase assay (Promega) and read in a  
419 Victor3 plate reader (Perkin Elmer) for light production.

420

#### 421 *Structural modeling and analyses.*

422 Three crystal structures, 2GHW the complex of 80R:SARS-CoV-RBD<sup>23</sup>, 2AJF the complex of  
423 hACE2:SARS-CoV-RBD<sup>34</sup> and 6VW1 the complex of hACE2:SARS-CoV-2-RBD<sup>22</sup> were used  
424 as initial scaffolds in the determinations of the models of MAb362:SARS-CoV-RBD and  
425 MAb362:SARS-CoV-2-RBD. The amino acid sequence of MAb362 was aligned to the amino  
426 acid sequences of 80R. The molecular modeling of MAb362 was performed through the  
427 program Modeller 9.15 using the basic modeling and forming the initial MAb362:SARS-CoV  
428 RBD complex. This structure was further refined using iterative energy minimization by  
429 Desmond as previously described<sup>35,36</sup>. The MAb362:SARS-CoV-2-RBD complex was made by  
430 replacing the SARS-CoV-2-RBD from 2AJF on the SARS-CoV-RBD structure and further  
431 optimized. The structural model of MAb362 binds to the SARS-CoV-2 Spike trimer was based  
432 on 6VYB<sup>30</sup>. All figures were made within the PyMOL package. Hydrogen bonds were  
433 determined for pairs of eligible donor/acceptor atoms using criteria set by Schrodinger  
434 (Schrodinger, LLC, The PyMOL Molecular Graphics System, Version 1.3r1. 2010.). The residue  
435 van der Waals potential between the various complexes was extracted from the structures  
436 energies using the energy potential within Desmond. Epitope residues predicted by modeling  
437 were individually mutated using BioXp™ 3200 System (SGI-DNA). The genes were cloned into

438 RBD expression vectors and RBD proteins were purified as described above. Mutant RBD were  
439 confirmed intact expression on proteins gels, and the same amount of proteins were coated on the  
440 plate for ELISA assays. ELISAs assay was performed to determine binding of the MAbs to the  
441 mutant proteins compared to the wild-type.

442

#### 443 *Affinity determination*

444 Bio-layer interferometry (BLI) with an Octet HTX (PALL/ForteBio) was used to determine the  
445 affinity of MAb362 IgG and IgA1 to the RBD of SARS-CoV and SARS-CoV-2 S protein. MAbs  
446 were added to 96 wells plates at 1000 nM and titrated 1:2 to 62 nM using PBS. RBD from  
447 SARS-CoV and SARS-CoV-2 were biotinylated (Thermo Fisher) and immobilized on  
448 Streptavidin (SA) Biosensors (ForteBio) for 120 seconds at 1600nM concentration. After a  
449 baseline step, MAb362-RBD binding rate was determined when the biosensors with immobilized  
450 RBD were exposed to MAb362 IgG or IgA1 at different concentrations for 120 seconds.  
451 Following association, the MAb362-RBD complex was exposed to PBS and the rate of the  
452 MAb362 dissociation from RBD was measured. Each assay was performed in triplicate. c

453

#### 454 *Statistical Analysis*

455 Statistical calculations were performed using Prism version 7.03 (GraphPad Software, La Jolla,  
456 CA).
